# Supplementary material for: Isolation of a novel species in the genus Cupriavidus from a patient with sepsis using whole genome sequencing
Source: PubMed Central journal article supplement (PMC7219751; doi:10.1371/journal.pone.0232850), 2020-05-13
Supplement: pone.0232850.s001.pdf [file pone.0232850.s001.pdf]

**S1 Table.** Results of Mash, the *in silico* method for estimating genome distance, for genomic sequencing of the novel *Cupriavidus* species.

| Identity | Shared-hashes | Median-multiplicity | P-value   | Accession No.   | Taxon name                         |
|----------|---------------|---------------------|-----------|-----------------|------------------------------------|
| 0.979767 | 651/1000      | 1                   | 0         | GCA_001281465.1 | <i>Cupriavidus gilardii</i>        |
| 0.882821 | 73/1000       | 1                   | 2.59E-318 | GCA_900249755.1 | <i>Cupriavidus taiwanensis</i>     |
| 0.873204 | 58/1000       | 1                   | 2.74E-247 | GCA_001598055.1 | <i>Cupriavidus oxalaticus</i>      |
| 0.871746 | 56/1000       | 1                   | 6.06E-238 | GCA_000069785.1 | <i>Cupriavidus taiwanensis</i>     |
| 0.860849 | 43/1000       | 1                   | 4.68E-178 | GCA_900249985.1 | <i>Cupriavidus taiwanensis</i>     |
| 0.853596 | 36/1000       | 1                   | 1.63E-146 | GCA_000876015.1 | <i>Cupriavidus basilensis</i>      |
| 0.852452 | 35/1000       | 1                   | 4.69E-142 | GCA_003854935.1 | <i>Cupriavidus pauculus</i>        |
| 0.851276 | 34/1000       | 1                   | 1.31E-137 | GCA_001592245.1 | <i>Cupriavidus oxalaticus</i>      |
| 0.850067 | 33/1000       | 1                   | 3.56E-133 | GCA_004217045.1 | <i>Cupriavidus</i> sp.<br>ASC-9842 |
